# Supplementary material for: Radical-constructed intergrown titanosilicalite interfaces for efficient direct propene epoxidation with H2 and O2
Source: Springer Nature journal article supplement (doi:10.1038/s41467-025-60637-0), 2025-07-01
Supplement: MOESM1 [file 41467_2025_60637_MOESM1_ESM.pdf]

**Radical-constructed Intergrown Titanosilicalite Interfaces for Efficient Direct  
Propene Epoxidation with H<sub>2</sub> and O<sub>2</sub>**

Dong Lin<sup>1,2</sup>, Xiang Feng<sup>1,\*</sup>, Yang Xu<sup>1</sup>, Richard J. Lewis<sup>2,\*</sup>, Xiao Chen<sup>3</sup>, Thomas E. Davies<sup>2</sup>, Samuel Pattisson<sup>2</sup>,  
Mark Douthwaite<sup>2</sup>, Defu Yin<sup>1</sup>, Qiuming He<sup>1</sup>, Xiuhui Zheng<sup>1</sup>, De Chen<sup>4</sup>, Chaohe Yang<sup>1</sup> and Graham J.  
Hutchings<sup>2,\*</sup>

*<sup>1</sup>State Key Laboratory of Heavy Oil Processing, China University of Petroleum, Qingdao 266580, China*

*<sup>2</sup>Max Planck- Cardiff Centre on the Fundamentals of Heterogeneous Catalysis FUNCAT, Cardiff Catalysis Institute, School  
of Chemistry, Cardiff University, Cardiff, CF24 4HQ, United Kingdom*

*<sup>3</sup>Beijing Key Laboratory of Green Chemical Reaction Engineering and Technology, Department of Chemical Engineering,  
Tsinghua University, Beijing 100084, China*

*<sup>4</sup>Department of Chemical Engineering, Norwegian University of Science and Technology, Trondheim 7491, Norway*

**Corresponding author**

Correspondence to: Xiang Feng (xiangfeng@upc.edu.cn); Richard J. Lewis (lewisl27@cardiff.ac.uk); Graham J.  
Hutchings (hutch@cardiff.ac.uk)

## Table of Contents

|                                                                                                    |     |
|----------------------------------------------------------------------------------------------------|-----|
| 1. Reagents                                                                                        | S3  |
| 2. Supplementary Tables                                                                            | S4  |
| Total acid density of different TS-1 samples                                                       | S4  |
| The relative content of Si/Ti, bulk Si/Ti ratios and Au contents in different framework topologies | S5  |
| The pore properties of different titanosilicalites before and after Au loading                     | S5  |
| A comparison of catalytic performance towards the in situ epoxidation of propene                   | S6  |
| 3. Supplementary Figures                                                                           | S8  |
| In-situ UV-vis-NIR system                                                                          | S8  |
| XRD patterns of different TS-1 samples                                                             | S9  |
| The FT-IR spectra of different TS-1 samples                                                        | S10 |
| NH <sub>3</sub> -TPD profiles of different TS-1 samples                                            | S11 |
| UV-vis spectra of TS-1 different samples                                                           | S12 |
| UV-Raman spectra of TS-1 different samples                                                         | S13 |
| Py-IR spectra of different TS-1 samples                                                            | S14 |
| Typical SEM images of different zeolites                                                           | S15 |
| The reaction performance of Au/TS-1-1000W                                                          | S16 |
| Typical HRTEM images of different catalysts                                                        | S17 |
| The Au 4f spectra of different catalysts                                                           | S18 |
| The TGA profiles of different catalysts                                                            | S19 |
| The C1s XPS spectra of different catalysts                                                         | S20 |
| The reaction performance of different catalysts                                                    | S21 |
| Typical STEM images and associated particle count histograms of different catalysts                | S22 |
| The productivity of H <sub>2</sub> O <sub>2</sub> on different Au/TS-1 catalysts                   | S23 |
| Free energies of adsorption on TiO <sub>4</sub> and TiO <sub>3</sub> sites                         | S24 |
| In-situ UV-vis spectra of different catalysts                                                      | S25 |
| The hydrogen efficiency of different catalysts                                                     | S26 |
| The electronic structure of different Ti sites                                                     | S27 |

## 1. Reagents

Propene ( $\text{C}_3\text{H}_6$ , 99.999 %, Shanghai Shenkai Gases Technology Co., Ltd)

Hydrogen ( $\text{H}_2$ , 99.999 %, Shanghai Shenkai Gases Technology Co., Ltd)

Oxygen ( $\text{O}_2$ , 99.999 %, Shanghai Shenkai Gases Technology Co., Ltd)

Nitrogen ( $\text{N}_2$ , 99.999 %, Shanghai Shenkai Gases Technology Co., Ltd)

Tetrapropylammonium hydroxide solution (TPAOH, 25 wt%, Sinopharm Chemical Reagent Co., Ltd)

Tetraethyl orthosilicate (TEOS, 98.5 wt%, Sinopharm Chemical Reagent Co., Ltd)

Tetrabutyl titanate (TBOT, 99.0 wt%, Shanghai Aladdin Biochemical Technology Co., Ltd)

Chloroauric acid ( $\text{HAuCl}_4 \cdot 4\text{H}_2\text{O}$ , 99.9 wt %, Sinopharm Chemical Reagent Co., Ltd)

Sodium carbonate ( $\text{Na}_2\text{CO}_3$ , 99.5 wt%, Shanghai Aladdin Biochemical Technology Co., Ltd)

## 2. Supplementary Tables

**Table S1** Total acid density of different TS-1 samples.

| Samples    | Acid density (mmol/g) |
|------------|-----------------------|
| TS-1-200W  | $2.67 \times 10^{-2}$ |
| TS-1-300W  | $2.06 \times 10^{-2}$ |
| TS-1-500W  | $1.84 \times 10^{-2}$ |
| TS-1-1000W | $1.58 \times 10^{-2}$ |

**Table S2** The relative content of Si/Ti, bulk Si/Ti ratios and Au contents in different framework topologies.

|            | SiO <sub>2</sub> (wt%) | TiO <sub>2</sub> (wt%) | Si/Ti molar ratio <sup>a</sup> | Au loading (wt%) <sup>b</sup> |
|------------|------------------------|------------------------|--------------------------------|-------------------------------|
| TS-1-200W  | 99.30                  | 0.62                   | 211                            | 0.07                          |
| TS-1-300W  | 98.84                  | 0.63                   | 207                            | 0.07                          |
| TS-1-500W  | 99.24                  | 0.68                   | 192                            | 0.07                          |
| TS-1-1000W | 99.32                  | 0.66                   | 201                            | 0.07                          |

<sup>a</sup>The bulk Si/Ti ratios were determined by the XRF results.

<sup>b</sup>The bulk Au loadings were determined by the ICP results.

**Table S3** The pore properties of different titanosilicalites before and after Au loading.

| Samples    | V <sub>micro</sub> <sup>a</sup> (cm <sup>3</sup> g <sup>-1</sup> ) before Au loading | V <sub>micro</sub> <sup>a</sup> (cm <sup>3</sup> g <sup>-1</sup> ) after Au loading | V <sub>na</sub> <sup>b</sup> | V <sub>na</sub> /V <sub>support</sub> <sup>c</sup> |
|------------|--------------------------------------------------------------------------------------|-------------------------------------------------------------------------------------|------------------------------|----------------------------------------------------|
| TS-1-200W  | 0.194                                                                                | 0.189                                                                               | 0.005                        | 0.974                                              |
| TS-1-300W  | 0.191                                                                                | 0.188                                                                               | 0.003                        | 0.984                                              |
| TS-1-500W  | 0.189                                                                                | 0.181                                                                               | 0.008                        | 0.958                                              |
| TS-1-1000W | 0.205                                                                                | 0.197                                                                               | 0.008                        | 0.961                                              |

<sup>a</sup>V<sub>micro</sub> represent the microporous volume before and after Au loading.

<sup>b</sup>V<sub>na</sub> represent the volume not accessible to N<sub>2</sub> after Au loading. V<sub>na</sub> is the difference between the micropore volumes of TS-1 support and Au/TS-1 catalyst.

<sup>c</sup>V<sub>na</sub>/V<sub>support</sub> represent the effect of spatial location of gold for support volume.

The descriptor (V<sub>na</sub>/V<sub>support</sub>) serves as a tool for estimating the extent to which zeolite channels are occupied by the Au nanoparticles. Here, V<sub>na</sub> denote the volume inaccessible to probe molecules (N<sub>2</sub>). The volume not accessible to N<sub>2</sub> is calculated as the difference between the micropore volumes of the TS-1 support (V<sub>support</sub>) and the Au/TS-1 catalyst.

**Table S4** A comparison of catalytic performance towards the in situ epoxidation of propene.

| Catalyst         | Reaction conditions                                                                                                                                                                      | PO formation rate ( $\text{g}_{\text{PO}}\text{h}^{-1}\text{g}_{\text{Au}}^{-1}$ ) | PO formation rate ( $\text{g}_{\text{PO}}\text{h}^{-1}\text{kg}_{\text{Cat}}^{-1}$ ) | Reference |
|------------------|------------------------------------------------------------------------------------------------------------------------------------------------------------------------------------------|------------------------------------------------------------------------------------|--------------------------------------------------------------------------------------|-----------|
| Au/TS-1-500W     | 200°C, 0.15 g of catalyst,<br>$\text{H}_2/\text{O}_2/\text{C}_3\text{H}_6/\text{N}_2=1:1:1:7$ ,<br>space velocity: 14000<br>$\text{mL}\cdot\text{h}^{-1}\cdot\text{g}_{\text{Cat}}^{-1}$ | 455.0                                                                              | 318.5                                                                                | This work |
| Au/TS-1-B        | 200°C, 0.15 g of catalyst,<br>$\text{H}_2/\text{O}_2/\text{C}_3\text{H}_6/\text{N}_2=1:1:1:7$ ,<br>space velocity: 14000<br>$\text{mL}\cdot\text{h}^{-1}\cdot\text{g}_{\text{Cat}}^{-1}$ | 151.5                                                                              | 151.5                                                                                | [9]       |
| Au/TS-2-B        | 200°C, 0.15 g of catalyst,<br>$\text{H}_2/\text{O}_2/\text{C}_3\text{H}_6/\text{N}_2=1:1:1:7$ ,<br>space velocity: 19200<br>$\text{mL}\cdot\text{h}^{-1}\cdot\text{g}_{\text{Cat}}^{-1}$ | 118                                                                                | 131                                                                                  | [46]      |
| 0.122Au/TS-1(99) | 200°C, 0.15 g of catalyst,<br>$\text{H}_2/\text{O}_2/\text{C}_3\text{H}_6/\text{N}_2=1:1:1:7$ ,<br>space velocity: 14000<br>$\text{mL}\cdot\text{h}^{-1}\cdot\text{g}_{\text{Cat}}^{-1}$ | 69                                                                                 | 84                                                                                   | [51]      |
| 0.143Au/TS-1(99) | 200°C, 0.15 g of catalyst,<br>$\text{H}_2/\text{O}_2/\text{C}_3\text{H}_6/\text{N}_2=1:1:1:7$ ,<br>space velocity: 14000<br>$\text{mL}\cdot\text{h}^{-1}\cdot\text{g}_{\text{Cat}}^{-1}$ | 103                                                                                | 148                                                                                  | [51]      |
| 0.146Au/TS-1(99) | 200°C, 0.15 g of catalyst,<br>$\text{H}_2/\text{O}_2/\text{C}_3\text{H}_6/\text{N}_2=1:1:1:7$ ,<br>space velocity: 14000<br>$\text{mL}\cdot\text{h}^{-1}\cdot\text{g}_{\text{Cat}}^{-1}$ | 105                                                                                | 154                                                                                  | [51]      |
| Au/HTS-1(NIMG)   | 200°C, 0.15 g of catalyst,<br>$\text{H}_2/\text{O}_2/\text{C}_3\text{H}_6/\text{N}_2=1:1:1:7$ ,<br>space velocity: 14000<br>$\text{mL}\cdot\text{h}^{-1}\cdot\text{g}_{\text{Cat}}^{-1}$ | 150.3                                                                              | 150.3                                                                                | [52]      |
| Au-Ti@MFI        | 300°C, 0.15 g of catalyst,<br>$\text{H}_2/\text{O}_2/\text{C}_3\text{H}_6/\text{N}_2=1:1:1:7$ ,<br>space velocity: 7000<br>$\text{mL}\cdot\text{h}^{-1}\cdot\text{g}_{\text{Cat}}^{-1}$  | 41                                                                                 | 205                                                                                  | [53]      |
| Au/TS-1-B        | 200°C, 0.15 g of catalyst,<br>$\text{H}_2/\text{O}_2/\text{C}_3\text{H}_6/\text{N}_2=1:1:1:7$ ,<br>space velocity: 14000<br>$\text{mL}\cdot\text{h}^{-1}\cdot\text{g}_{\text{Cat}}^{-1}$ | 267                                                                                | 240                                                                                  | [54]      |
| Au/TS-1-B(4)     | 200°C, 0.15 g of catalyst,<br>$\text{H}_2/\text{O}_2/\text{C}_3\text{H}_6/\text{N}_2=1:1:1:7$ ,<br>space velocity: 14000<br>$\text{mL}\cdot\text{h}^{-1}\cdot\text{g}_{\text{Cat}}^{-1}$ | 160                                                                                | 144                                                                                  | [55]      |

|                    |                                                                                                                                                                                                      |       |      |      |
|--------------------|------------------------------------------------------------------------------------------------------------------------------------------------------------------------------------------------------|-------|------|------|
| 0.05Au/U-TS-1(119) | 200°C, 0.15 g of catalyst,<br>H <sub>2</sub> /O <sub>2</sub> /C <sub>3</sub> H <sub>6</sub> /N <sub>2</sub> =1:1:1:7,<br>space velocity: 14000<br>mL·h <sup>-1</sup> ·g <sub>Cat</sub> <sup>-1</sup> | 130   | 65   | [56] |
| 0.07Au/U-TS-1(119) | 200°C, 0.15 g of catalyst,<br>H <sub>2</sub> /O <sub>2</sub> /C <sub>3</sub> H <sub>6</sub> /N <sub>2</sub> =1:1:1:7,<br>space velocity: 14000<br>mL·h <sup>-1</sup> ·g <sub>Cat</sub> <sup>-1</sup> | 127.1 | 89   | [56] |
| 0.09Au/U-TS-1(119) | 200°C, 0.15 g of catalyst,<br>H <sub>2</sub> /O <sub>2</sub> /C <sub>3</sub> H <sub>6</sub> /N <sub>2</sub> =1:1:1:7,<br>space velocity: 14000<br>mL·h <sup>-1</sup> ·g <sub>Cat</sub> <sup>-1</sup> | 106.7 | 96   | [56] |
| 0.14Au/TS-1(121)Cs | 200°C, 0.15 g of catalyst,<br>H <sub>2</sub> /O <sub>2</sub> /C <sub>3</sub> H <sub>6</sub> /N <sub>2</sub> =1:1:1:7,<br>space velocity: 14000<br>mL·h <sup>-1</sup> ·g <sub>Cat</sub> <sup>-1</sup> | 240.7 | 337  | [57] |
| 0.76Au/TS-1(77)Cs  | 200°C, 0.15 g of catalyst,<br>H <sub>2</sub> /O <sub>2</sub> /C <sub>3</sub> H <sub>6</sub> /N <sub>2</sub> =1:1:1:7,<br>space velocity: 14000<br>mL·h <sup>-1</sup> ·g <sub>Cat</sub> <sup>-1</sup> | 41.3  | 314  | [57] |
| 0.04Au/TS-1(121)Cs | 200°C, 0.15 g of catalyst,<br>H <sub>2</sub> /O <sub>2</sub> /C <sub>3</sub> H <sub>6</sub> /N <sub>2</sub> =1:1:1:7,<br>space velocity: 14000<br>mL·h <sup>-1</sup> ·g <sub>Cat</sub> <sup>-1</sup> | 245   | 98   | [57] |
| Au/TS-1-B (S-Na)   | 200°C, 0.15 g of catalyst,<br>H <sub>2</sub> /O <sub>2</sub> /C <sub>3</sub> H <sub>6</sub> /N <sub>2</sub> =1:1:1:7,<br>space velocity: 14000<br>mL·h <sup>-1</sup> ·g <sub>Cat</sub> <sup>-1</sup> | 297   | 89.1 | [58] |
| 0.23Na-Au/TS-1     | 200°C, 0.15 g of catalyst,<br>H <sub>2</sub> /O <sub>2</sub> /C <sub>3</sub> H <sub>6</sub> /N <sub>2</sub> =1:1:1:7,<br>space velocity: 14000<br>mL·h <sup>-1</sup> ·g <sub>Cat</sub> <sup>-1</sup> | 310   | 210  | [58] |

---

### 3. Supplementary Figures

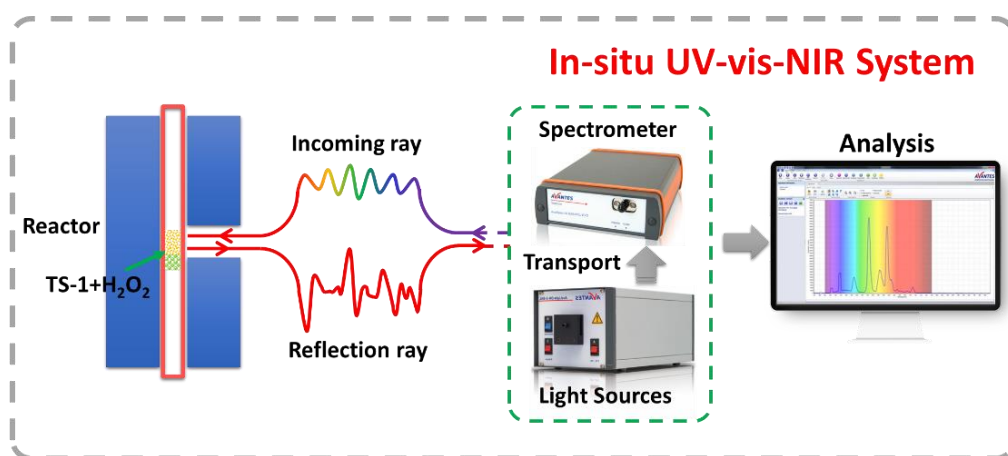

**Figure S1 In-situ UV-vis-NIR system.** The schematic diagram of the in-situ UV-vis-NIR system.



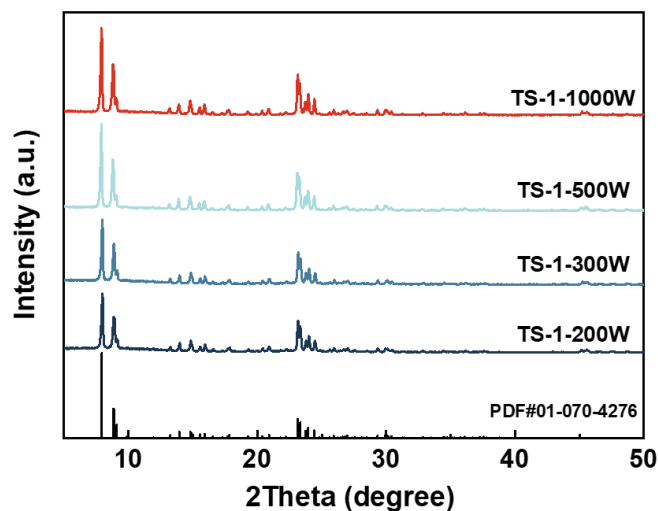

**Figure S2 XRD patterns of different TS-1 samples.** The XRD diffractograms of TS-1-200 W, TS-1-300 W, TS-1-500 W and TS-1-1000 W.

All TS-1 samples exhibit identical diffraction peaks, situated at  $2\theta$  of 7.9, 8.8, 23.1, 23.9, and 24.3°, thereby confirming the presence of the MFI topological structure. Moreover, in all TS-1 samples, a single peak is observed at  $2\theta = 24.3^\circ$ , affirming the presence of an orthorhombic unit cell in the structure. In the XRD spectra, it is evident that there are no significant peaks at  $25.4^\circ$ , suggesting that all samples either contain minimal or no  $\text{TiO}_2$  species.

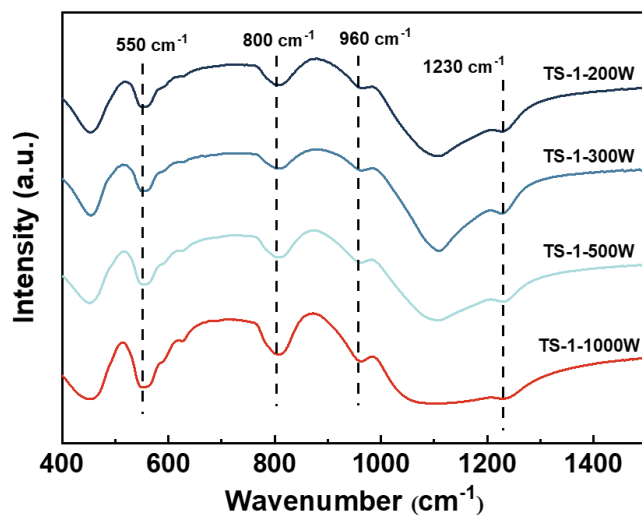

**Figure S3 The FT-IR spectra of different TS-1 samples.** The FT-IR spectra of TS-1-200W, TS-1-300W, TS-1-500W and TS-1-1000W.

The absorption band observed at  $550\text{ cm}^{-1}$  can be attributed to the vibration of the double five-membered ring unit, providing further evidence for the presence of the MFI structure, which aligns with the XRD findings. The bands appearing at  $800\text{ cm}^{-1}$  correspond to the antisymmetrical stretching vibrations of the  $[\text{SiO}_4]$  units. Additionally, the band observed at  $1230\text{ cm}^{-1}$  is associated with the asymmetrical stretching vibration of the MFI framework structure. The presence of the  $960\text{ cm}^{-1}$  band is often considered as indicative of Ti substitution within the framework, occurring in the form of Ti-O-Si.

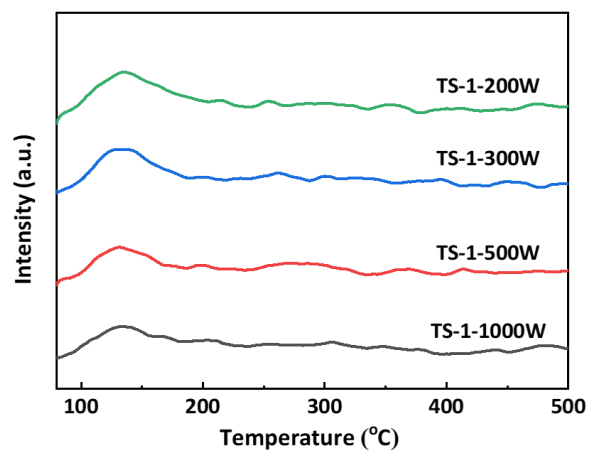

**Figure S4 NH<sub>3</sub>-TPD profiles of different TS-1 samples.** NH<sub>3</sub>-TPD profiles of different TS-1 samples synthesized with various power levels (ranging from 200 to 1000 W).

The NH<sub>3</sub>-TPD analysis was employed to assess the presence of acid sites in all TS-1 samples. As depicted in Figure S4, only one NH<sub>3</sub> desorption peak at 135 °C is evident across all TS-1 samples, indicating the existence of a minimal quantity of weak acid centers within TS-1 materials.

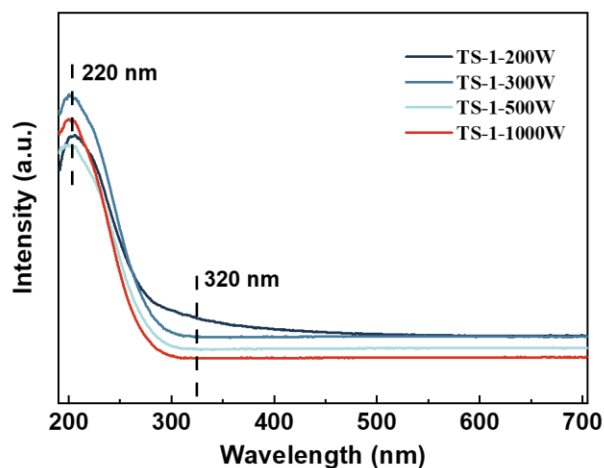

**Figure S5 UV-vis spectra of different TS-1 samples.** UV-vis spectra of TS-1-200W, TS-1-300W, TS-1-500W, TS-1-1000W.

The presence of Ti within the TS-1 framework is critical for its catalytic performance, a feature discernible through UV-vis characterization. The observation of a single adsorption peak at approximately 220 nm for all samples distinctly confirms the presence of isolated Ti(IV) species within the MFI framework. Notably, adsorption peaks associated with anatase  $\text{TiO}_2$  species were detected at 330 nm in TS-1-200W. No adsorption peaks associated with anatase  $\text{TiO}_2$  species were detected at 330 nm in TS-1-300W, TS-1-500W and TS-1-1000W.

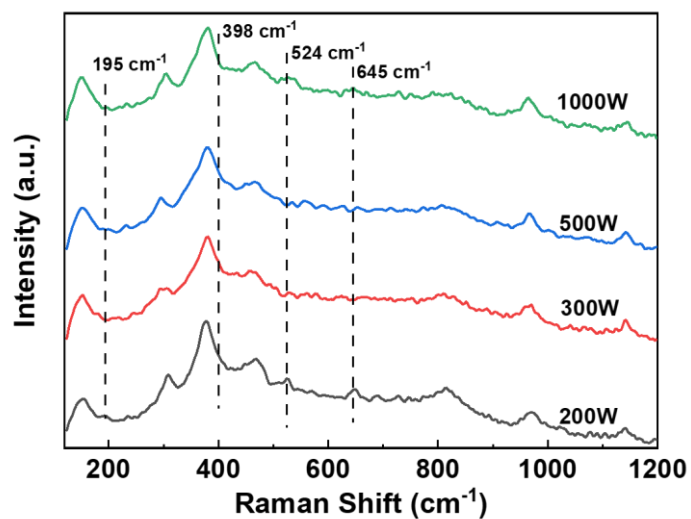

**Figure S6 UV-Raman spectra of different TS-1 samples.** UV-Raman spectra of TS-1-200W, TS-1-300W, TS-1-500W, TS-1-1000W.

It is noteworthy that only TS-1-200W exhibits small peaks at 195, 398, 524 and 645  $\text{cm}^{-1}$ , suggesting the presence of anatase  $\text{TiO}_2$ . These observations align with the results from UV-vis spectroscopy, XPS, and SEM, providing additional evidence that TS-1-200W contains  $\text{TiO}_2$  species, whereas other samples do not.

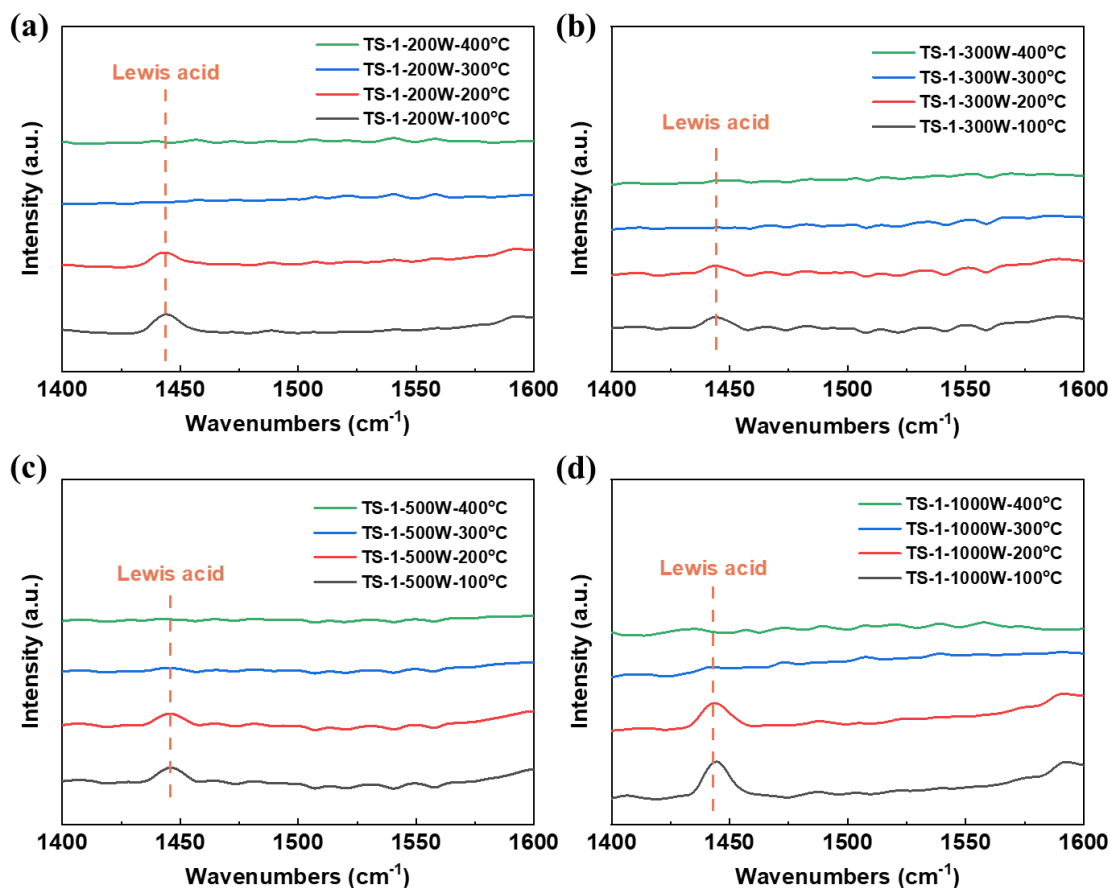

**Figure S7 Py-IR spectra of different TS-1 samples.** Py-IR spectra of different TS-1 samples synthesized with various power levels: (a) TS-1-200W, (b) TS-1-300W, (c) TS-1-500W and (d) TS-1-1000W.

The peaks at  $1447$  and  $1601\text{ cm}^{-1}$  are ascribed to Lewis acid sites (LA). Additionally, the peaks at  $1550$  and  $1490\text{ cm}^{-1}$  were attributed to Brønsted acid sites (BA) and the combination of Brønsted and Lewis acid sites (BA+LA), respectively. It is noteworthy that all titanosilicalites display prominent peaks of Lewis acid sites, linked to the framework Ti sites.

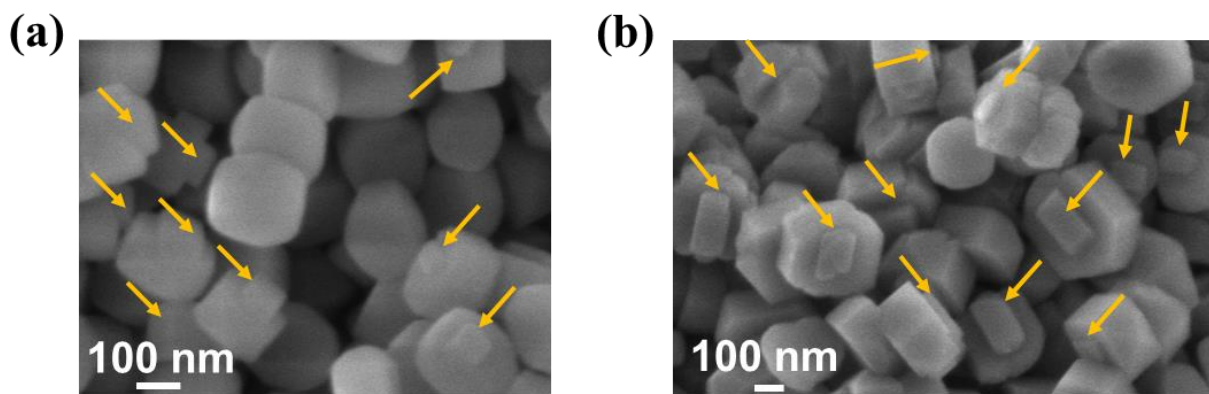

**Figure S8 Typical SEM images of different zeolites.** Typical SEM images of (a) pure siliceous S-1 and (b) Al-containing ZSM-5 samples.

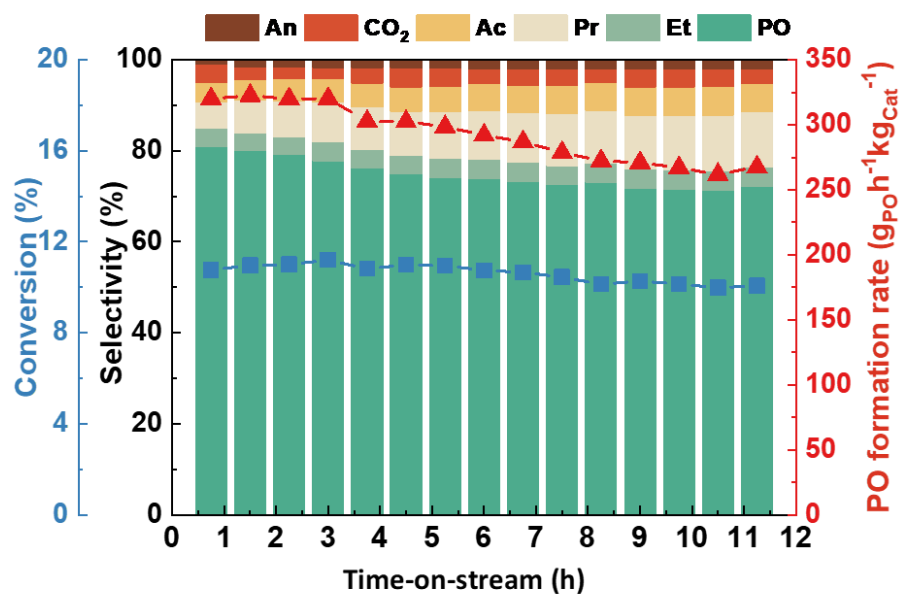

**Figure S9 The reaction performance of Au/TS-1-1000W.** The PO formation rate, propene conversion and reaction selectivity of Au/TS-1-1000W. Direct propene epoxidation with H<sub>2</sub> and O<sub>2</sub> conditions: reaction temperature (200°C), catalyst (0.15 g), H<sub>2</sub>/O<sub>2</sub>/C<sub>3</sub>H<sub>6</sub>/N<sub>2</sub>=1:1:1:7, space velocity of 14000 mL·h<sup>-1</sup>·g<sub>Cat</sub><sup>-1</sup>.



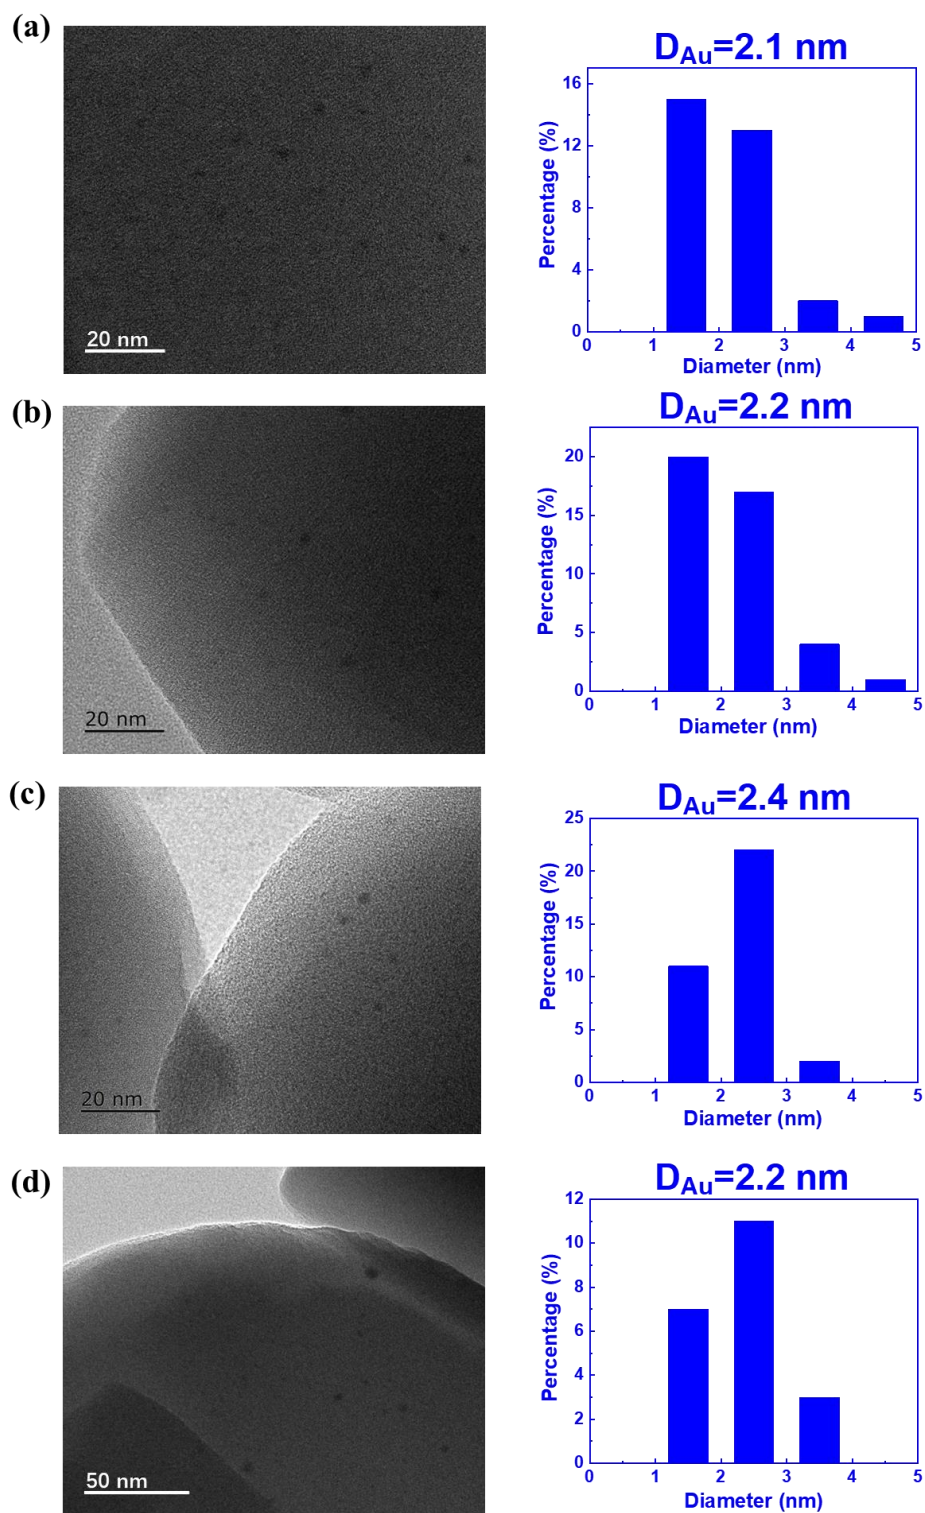

**Figure S10 Typical HRTEM images of different catalysts.** Typical HRTEM images of (a) Au/TS-1-200W, (b) Au/TS-1-300W, (c) Au/TS-1-500W and (d) Au/TS-1-1000W. The insets show the Au size distributions of all catalysts.

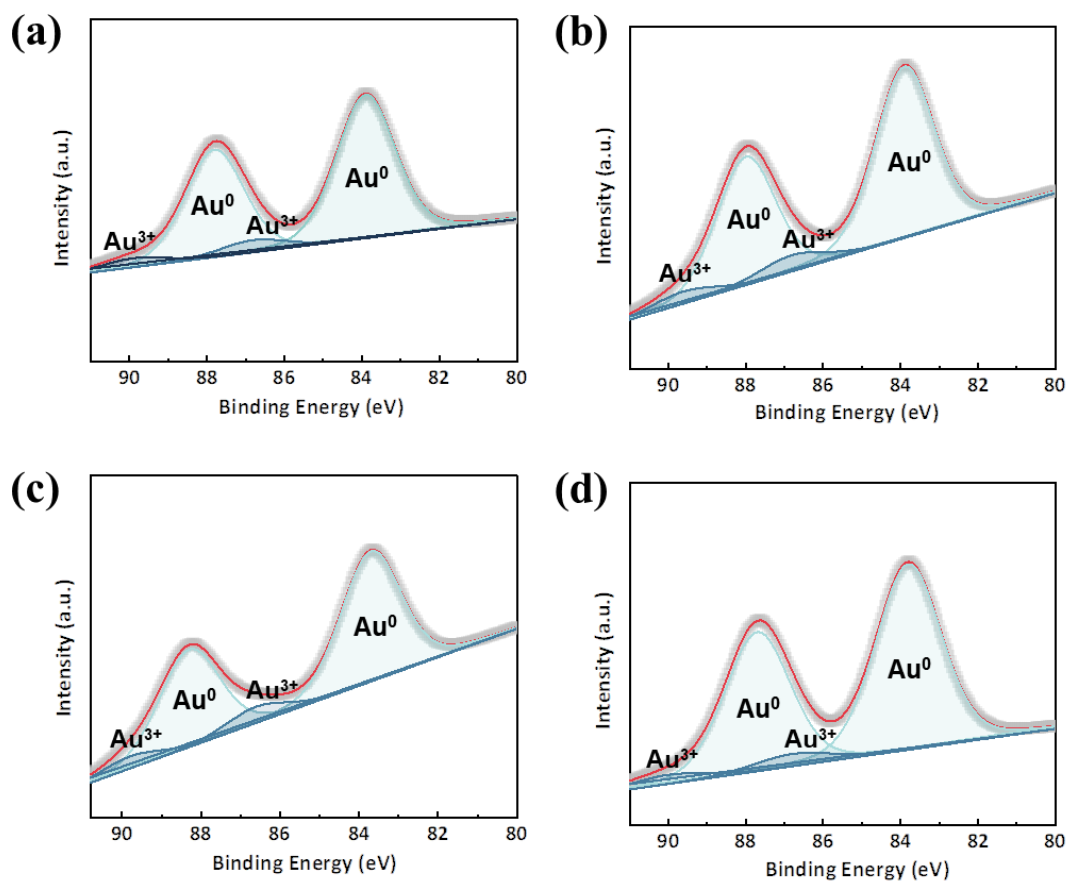

**Figure S11 The Au 4f spectra of different catalysts.** The Au 4f spectra of (a) Au/TS-1-200W, (b) Au/TS-1-300W, (c) Au/TS-1-500W and (d) Au/TS-1-1000W.

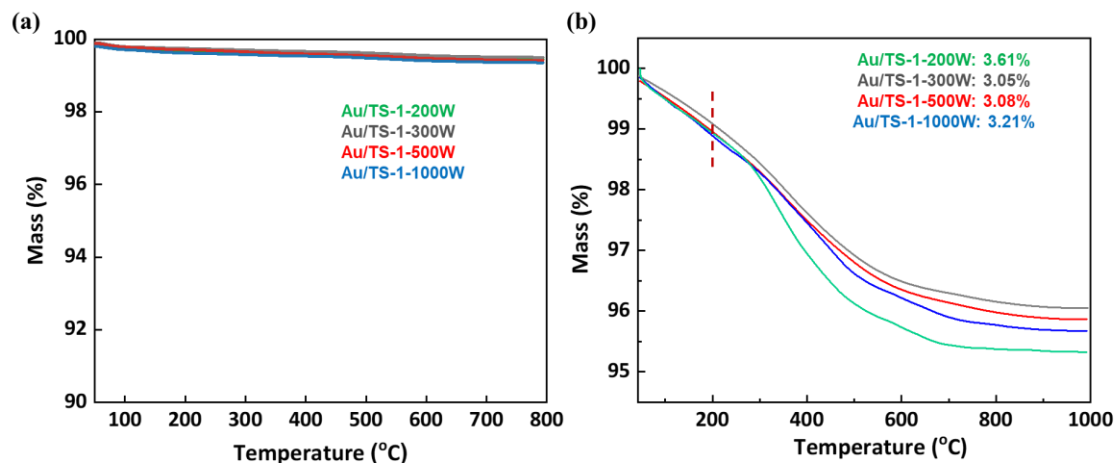

**Figure S12 The TGA profiles of different catalysts.** The TGA profiles of different (a) fresh catalysts and (b) catalysts after propene epoxidation at 200 °C.

The thermogravimetry analysis combined (TG, Netzsch) was used to reveal the coke content and coke species of the catalyst with a heating speed of 10°C/min from 30 to 1000°C. The weight loss occurring between 200-800°C and below 200°C is attributed to carbonaceous deposits and water, respectively.

The relative content of Si-OH ( $Q_3/Q_4$ ) decreased from 22.1% to 17.0% (Figure 1f-1i) with the increase of power levels (ranging from 200 to 1000 W). TS-1-200W exhibited the highest  $Q_3/Q_4$  ratio (22.1%), and a higher  $Q_3/Q_4$  ratio indicates lower hydrophobicity, which is considered to hinder the desorption of propylene oxide (PO) molecules and promote the formation of carbonaceous species. As a result, Au/TS-1-200W demonstrated the highest weight loss (~3.61%) after propene epoxidation with  $H_2$  and  $O_2$ .

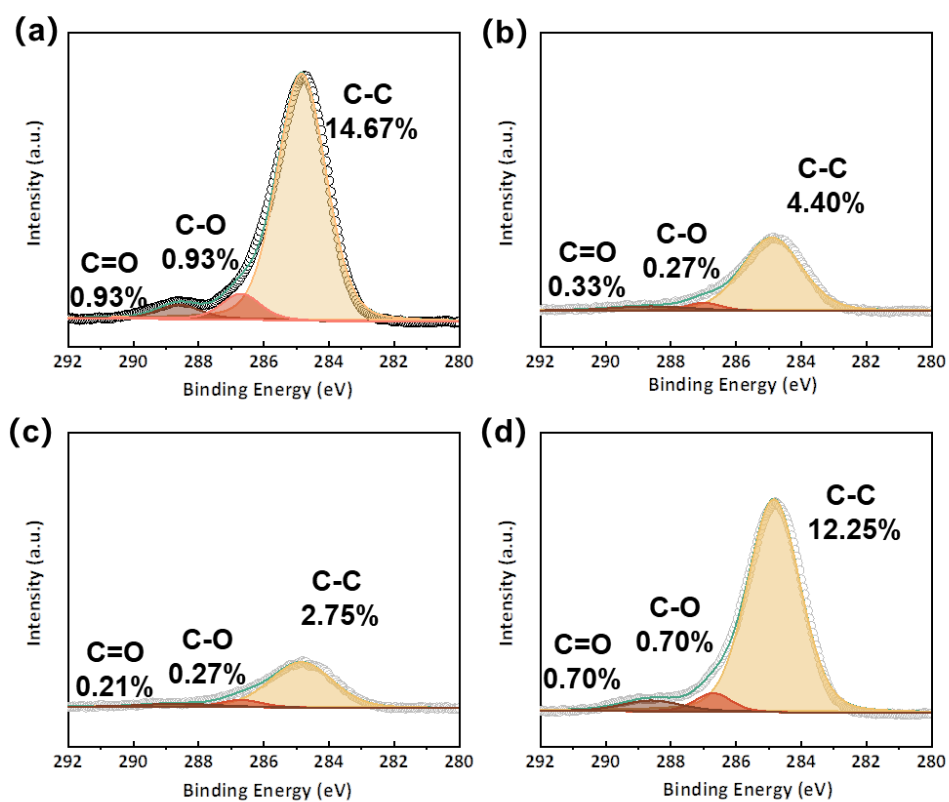

**Figure S13** The C1s XPS spectra of different catalysts. The C1s XPS spectra of (a) Au/TS-1-200W, (b) Au/TS-1-300W, (c) Au/TS-1-500W and (d) Au/TS-1-1000W.

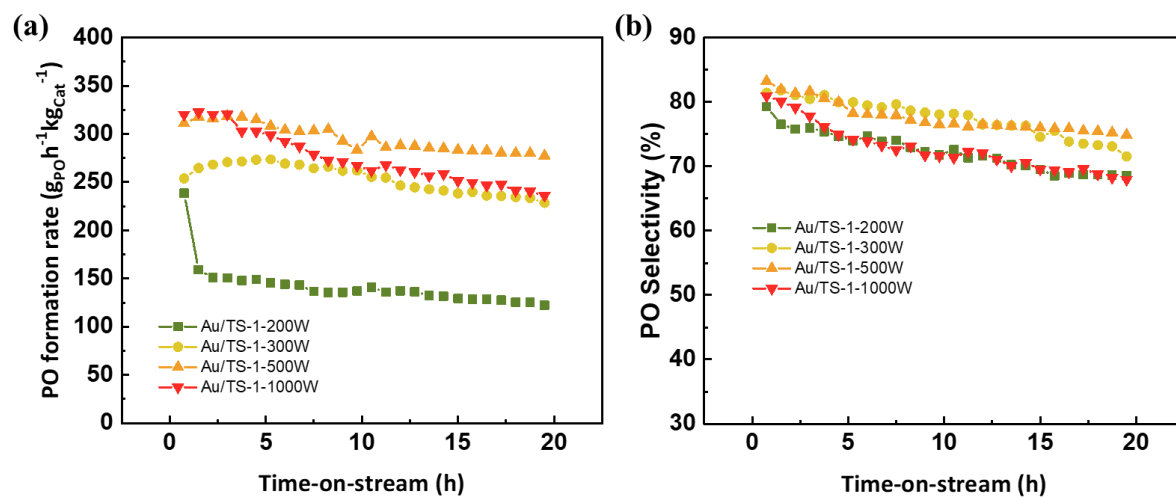

**Figure S14 The reaction performance of different catalysts.** The (a) PO formation rate and (b) reaction selectivity of different Au/TS-1 catalysts. Direct propene epoxidation with  $\text{H}_2$  and  $\text{O}_2$  conditions: reaction temperature ( $200^\circ\text{C}$ ), catalyst (0.15 g),  $\text{H}_2/\text{O}_2/\text{C}_3\text{H}_6/\text{N}_2=1:1:1:7$ , space velocity of  $14000 \text{ mL}\cdot\text{h}^{-1}\cdot\text{g}_{\text{Cat}}^{-1}$ .

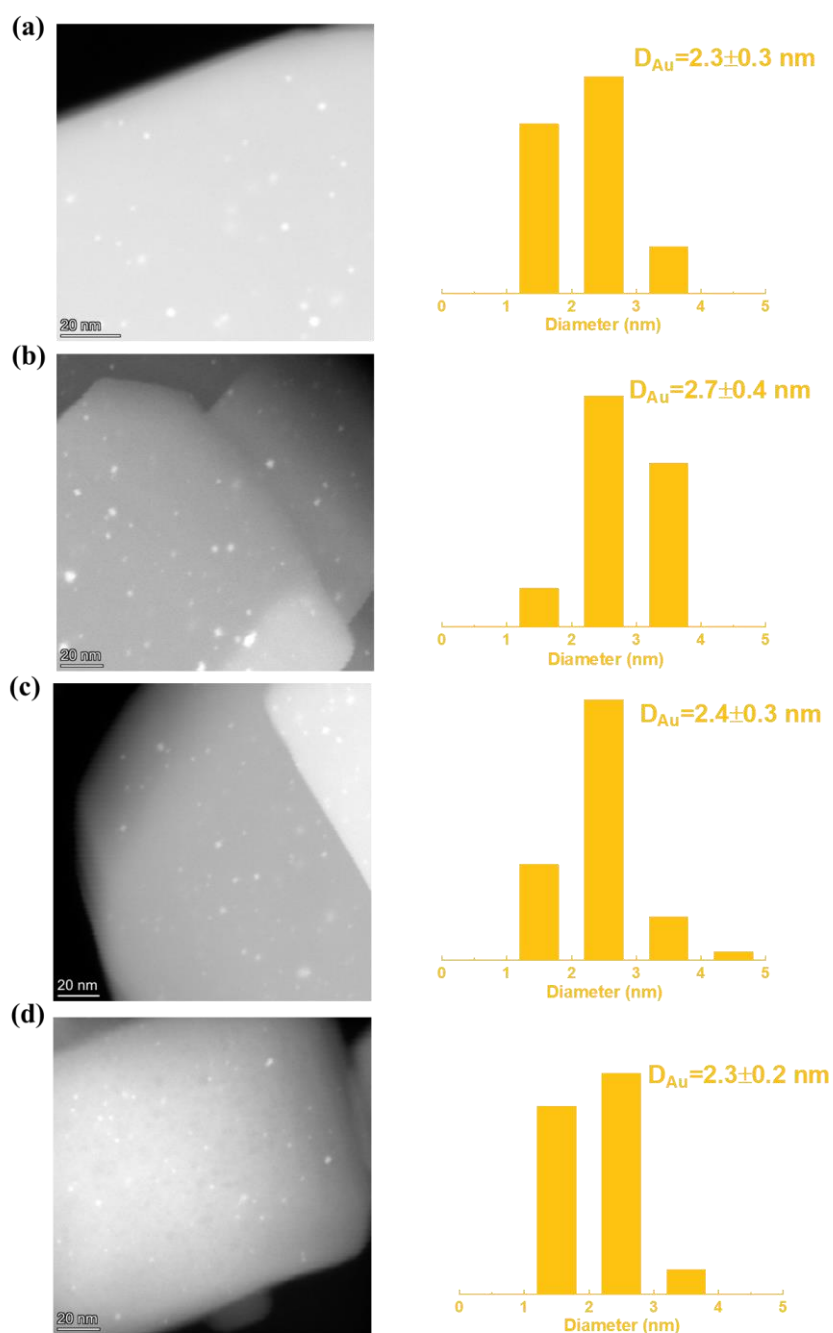

**Figure S15 Typical STEM images and associated particle count histograms of different catalysts.** Typical STEM images and associated particle count histograms of (a) Au/TS-1-200W, (b) Au/TS-1-300W, (c) Au/TS-1-500W and (d) Au/TS-1-1000W after reaction. Direct propene epoxidation with  $H_2$  and  $O_2$  conditions: reaction temperature ( $200^\circ C$ ), catalyst (0.15 g),  $H_2/O_2/C_3H_6/N_2=1:1:1:7$ , space velocity of  $14000 \text{ mL}\cdot\text{h}^{-1}\cdot\text{g}_{Cat}^{-1}$ .

Post-reaction HRTEM analysis of the different Au/TS-1 catalysts revealed that their Au particle sizes ( $\sim 2.4 \text{ nm}$ ) remained nearly unchanged before and after propene epoxidation (Figure S15).

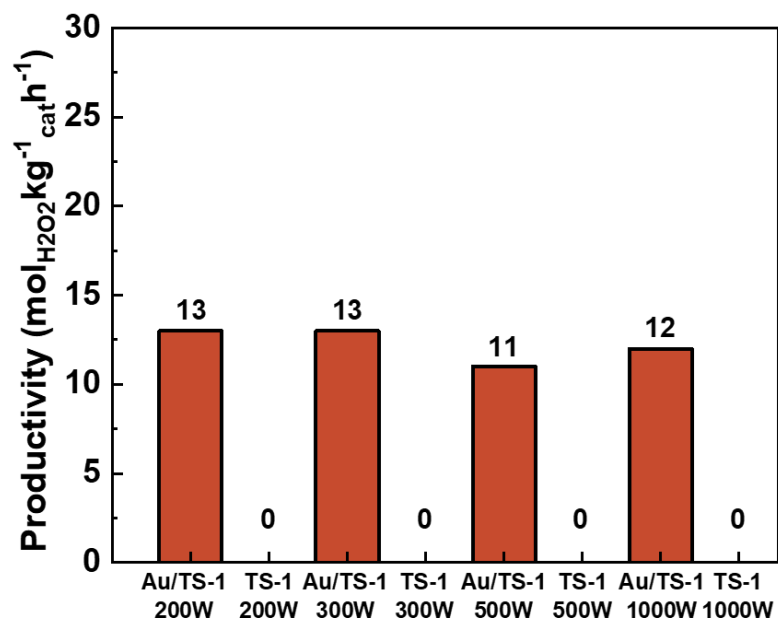

**Figure S16 The productivity of H<sub>2</sub>O<sub>2</sub> on different Au/TS-1 catalysts.** The productivity of H<sub>2</sub>O<sub>2</sub> by direct synthesis between H<sub>2</sub> and O<sub>2</sub> on different Au/TS-1 catalysts. H<sub>2</sub>O<sub>2</sub> synthesis conditions: Catalyst (0.01g), H<sub>2</sub>O (2.9 g), MeOH (5.6 g), 5% H<sub>2</sub>/CO<sub>2</sub> (420 psi), 25% O<sub>2</sub>/CO<sub>2</sub> (160 psi), reaction time 0.5 h, reaction temperature 2 °C, stirring speed 1200 rpm.

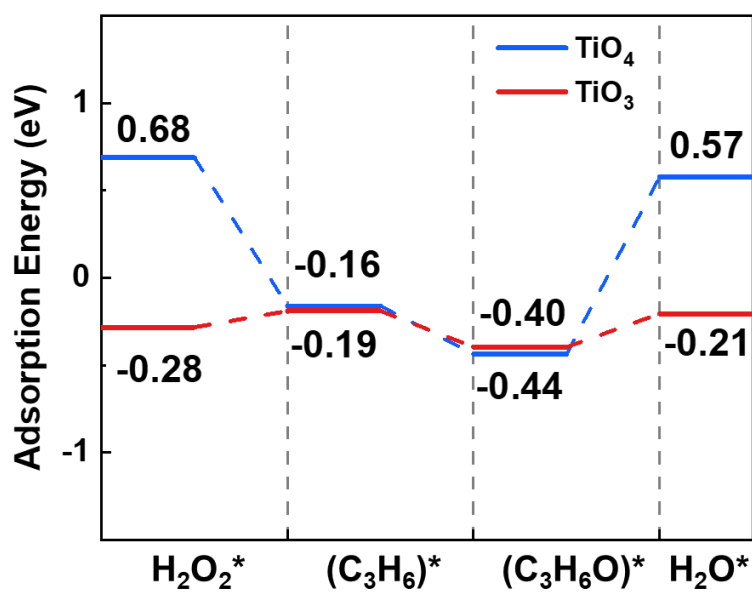

**Figure S17 Free energies of adsorption on TiO<sub>4</sub> and TiO<sub>3</sub> sites.** Calculated free energies of adsorption for different intermediates on TiO<sub>4</sub> and TiO<sub>3</sub> sites.



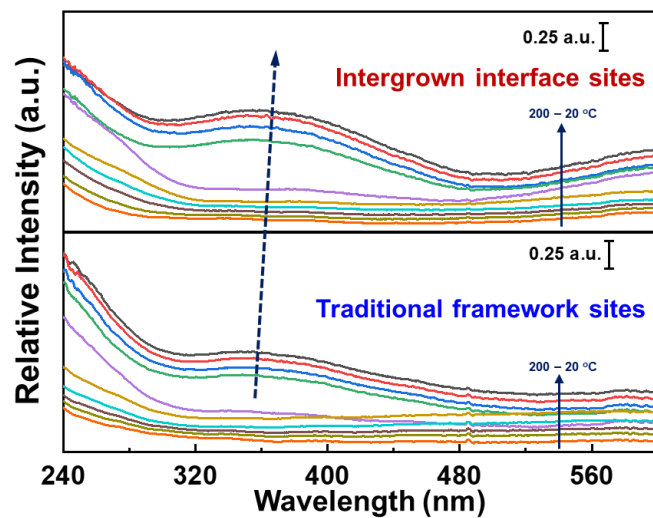

**Figure S18 In-situ UV-vis spectra of different catalysts.** In-situ UV-vis spectra of Au/TS-1-300W (traditional framework sites) and Au/TS-1-500W (intergrown interface sites) after contact with performed  $\text{H}_2\text{O}_2$ . Experimental conditions: 0.15 g of TS-1 samples were used in conjunction with 0.01 g of  $\text{H}_2\text{O}_2$ , while maintaining a temperature range from 20 to 200°C, with data points collected every 20-degree interval.

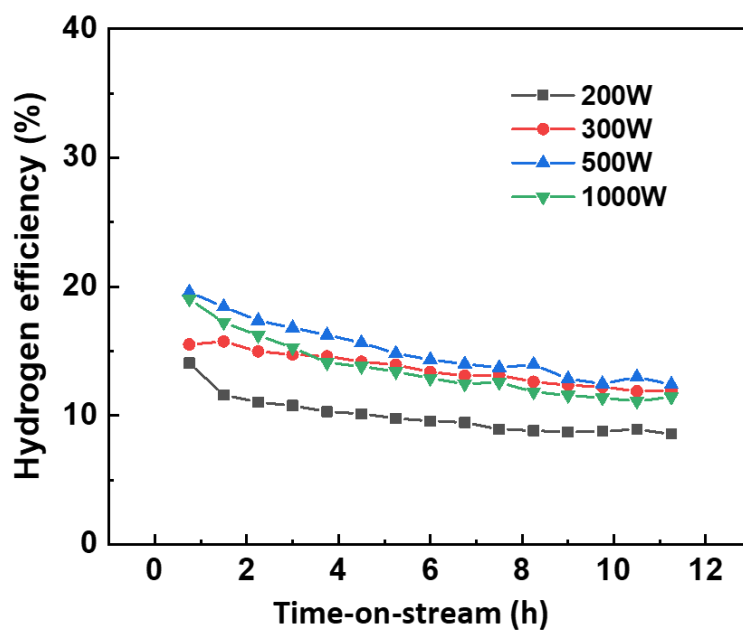

**Figure S19 The hydrogen efficiency of different catalysts.** The hydrogen efficiency of Au/TS-1-200W, Au/TS-1-300W, Au/TS-1-500W and Au/TS-1-1000W. Direct propene epoxidation with  $\text{H}_2$  and  $\text{O}_2$  conditions: reaction temperature (200 °C), catalyst (0.15 g),  $\text{H}_2/\text{O}_2/\text{C}_3\text{H}_6/\text{N}_2=1:1:1:7$ , space velocity of  $14000 \text{ mL}\cdot\text{h}^{-1}\cdot\text{g}_{\text{cat}}^{-1}$ .

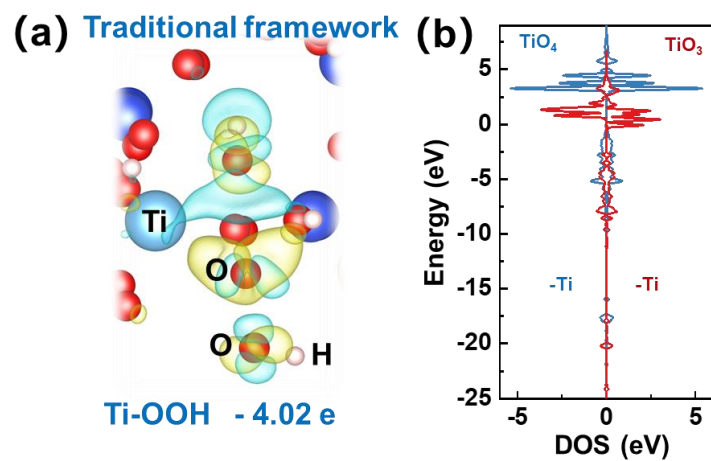

**Figure S20 The electronic structure of different Ti sites.** (a) The differential charge density plots of  $\text{H}_2\text{O}_2$  adsorbed on traditional framework sites. (b) The total density of states (DOS) of Ti- atoms on traditional framework and intergrown interface sites.
